# Supplementary material for: Association between human herpesvirus infection and cervical carcinoma: a systematic review and meta-analysis
Source: Springer Nature journal article supplement (doi:10.1186/s12985-023-02234-5), 2023-12-04
Supplement: MOESM2 [file 26491040]

**Supplementary Table 1. Characteristics of eligible studies**

| Virus   | Reference                        | Country       | Population & Sample size                                                                     | Method                                      | Target                  | Type of sample      | Score |
|---------|----------------------------------|---------------|----------------------------------------------------------------------------------------------|---------------------------------------------|-------------------------|---------------------|-------|
| HSV-2   | Adam et al 1974                  | USA           | CC = 50; CON = 186                                                                           | Immunological (NT)                          | Antibodies              | Serum               | 7     |
| HSV-2   | Adam et al 1985                  | USA           | CIN = 23; CON = 23                                                                           | Immunological (RIA)                         | Antibodies              | Serum               | 6     |
| HSV-2   | Adelusi et al 1976               | Nigeria       | CC = 94; CON = 99                                                                            | Immunological (CF)                          | Antibodies              | Serum               | 6     |
| EBV     | Ammatuna et al 2000              | Italy         | CIN1= 52; CIN2/3= 7; CON = 51                                                                | PCR-based (PCR)                             | BAMHI-L                 | Brush/swab          | 6     |
| HHV-6   | Arivananthan et al 1997          | Malaysia      | CC = 30; CON = 7                                                                             | Hybridization-based (ISH)                   | HHV-6A/B                | FFPE                | 6     |
| HSV-2   | Arnheim et al 2011               | Finland et al | CC = 603; CON = 2968                                                                         | Immunological (ELISA)                       | Antibodies              | Serum               | 7     |
| EBV     | Aromseree et al 2015             | Thailand      | CC = 40; CIN1= 85;<br>CIN2/3= 85; CON = 82;                                                  | PCR-based (PCR)                             | BALF5                   | Biopsy              | 5     |
| HSV-2   | Aurelian et al 1973              | USA           | CC = 49; CON to CC = 49; PCL = 20; CON to PCL = 20                                           | Immunological (NT)                          | Antibodies              | Serum               | 6     |
| HSV-2   | Bahena-Román et al 2020          | Mexico        | CC = 171; CIN1 = 231; CIN2/3 = 37; CON = 205<br>CC = 171; CIN1 = 228; CIN2/3 = 40; CON = 205 | Immunological (ELISA)<br>PCR-based (RT-PCR) | Antibodies<br>HSV-2 DNA | Serum<br>Brush/swab | 7     |
| HSV-1   | Becker et al 1996                | USA           | CIN1 = 57; CIN2 = 74; CIN3 = 124; CON = 332                                                  | Immunological <sup>a</sup>                  | Antibodies              | Serum               | 7     |
| HSV-2   |                                  |               | CIN1 = 57; CIN2 = 73; CIN3 = 124; CON = 333                                                  |                                             |                         |                     |       |
| HSV-1/2 | Bell et al 1978                  | USA           | CC = 13; CON to CC = 13; PCL = 17; CON to PCL = 15                                           | Immunological (NT)                          | Antibodies              | Serum               | 6     |
| HHV-6/7 | Biganzoli et al 2020             | Argentina     | CIN1 = 61; CIN2/3 = 35; CON = 29                                                             | PCR-based (Nested PCR)                      | HHV-6/7 DNA             | Brush/swab          | 7     |
| HCMV    | Broccolo et al 2008              | Italy         | CIN1 = 46; CIN2/3 = 57; CON = 66                                                             | PCR-based (RT-PCR)                          | HCMV DNA                | Brush/swab          | 6     |
| HHV-6/7 |                                  |               |                                                                                              |                                             | HHV-6/7 DNA             |                     |       |
| HCMV    | Brock et al 1989                 | Australia     | CC = 115; CON = 193                                                                          | Immunological                               | Antibodies              | Serum               | 6     |
| HSV-1/2 |                                  |               |                                                                                              |                                             |                         |                     |       |
| EBV     | Cameron et al 2018               | Kenya         | CIN1= 50; CIN2/3= 14; CON = 266                                                              | PCR-based (PCR)                             | BamH1-W                 | Brush/swab          | 7     |
| HCMV    | Chan et al 1999                  | China         | CC = 30; CIN1 = 56; CIN2 = 34; CIN3 = 77; CON = 207                                          | PCR-based (Nested PCR)                      | HCMV mtrII              | Brush/swab          | 5     |
| KSHV    |                                  |               |                                                                                              |                                             | ORF25; ORF26            |                     |       |
| KSHV    | Chavoshpour-Mamaghani et al 2021 | Iran          | Cervical cancer = 61; PCL = 124; CON = 179                                                   | PCR-based (PCR)                             | ORF26                   | FFPE<br>Brush/swab  | 7     |

|         |                        |                |                                                                                          |                            |                         |            |   |
|---------|------------------------|----------------|------------------------------------------------------------------------------------------|----------------------------|-------------------------|------------|---|
| HSV-2   | Choi et al 1977        | Canada         | CC = 57; CON = 166                                                                       | Immunological <sup>b</sup> | Antibodies              | Serum      | 6 |
| HSV-2   | Dale et al 1988        | UK             | CC = 70; CIN = 34; CON = 108                                                             | Immunological (ELISA)      | Antibodies              | Serum      | 6 |
| HCMV    | Daxnerova et al 2003   | USA            | CIN1 = 154; CIN2/3 = 250; CON = 266                                                      | PCR-based (PCR)            | HCMV DNA                | Brush/swab | 6 |
| HSV-1/2 | de Abreu et al 2016    | Brazil         | CIN2/3 = 71; CON = 614                                                                   | PCR-based (PCR)            | HSV-1/2 DNA             | Brush/swab | 7 |
| HSV-2   | de Sanjosé et al 1994  | Spain          | CC = 223; CON to CC = 238; CIN3 = 249; CON to CIN3 = 242                                 | Immunological (ELISA)      | Antibodies              | Serum      | 7 |
| HCMV    |                        | Colombia       | CC = 150; CON to CC = 149; CIN3 = 276; CON to CIN3 = 270                                 |                            |                         |            |   |
| HSV-2   | D.Soumya et al 2023    | India          | CC = 109; CON = 26                                                                       | Immunological (ELISA)      | Antibodies              | Serum      | 6 |
| HSV-2   | Farivar et al 2012     | Iran           | CC = 76; CON = 150                                                                       | PCR-based (RT-PCR)         | HSV-2 DNA               | FFPE       | 5 |
| EBV     | Feng et al 2021        | China          | CIN1 = 1; CIN2/3 = 5; CON = 159                                                          | PCR-based (RT-PCR)         | EBV DNA                 | Brush/swab | 6 |
| HSV-2   | Ferrera et al 1997     | Honduras       | CIN1 = 9; CON to CIN1 = 18; CIN2/3 = 33; CON to CIN2/3 = 65;<br>CC = 48; CON to CC = 93; | Immunological (ELISA)      | Antibodies              | Serum      | 6 |
| HCMV    |                        |                | CIN1 = 9; CON to CIN1 = 18; CIN2/3 = 32; CON to CIN2/3 = 63;<br>CC = 49; CON to CC = 95  |                            |                         |            |   |
| HSV-2   | Graham et al 1982      | USA            | CC = 134; PCL = 47; CON = 130                                                            | Immunological (RIA)        | Antibodies              | Serum      | 8 |
| HSV-2   | Gupta et al 1992       | India          | CC = 51; CON to CC = 47; CIN = 76; CON to CIN = 72                                       | Immunological <sup>c</sup> | Antibodies              | Serum      | 8 |
| HSV-1/2 | Janda et al 1973       | Czechoslovakia | CC = 61; CON to CC = 57; PCL = 18; CON to PCL = 18                                       | Immunological (NT)         | Antibodies              | Serum      | 6 |
| EBV     | Kahla et al 2012       | Tunisia        | CC = 44; CON = 81                                                                        | PCR-based (PCR)            | EBNA1                   | Biopsy     | 8 |
| HSV-2   | Kalimo et al 1981      | Finland        | CC = 7; CON = 26                                                                         | Immunological (RIA)        | Antibodies <sup>d</sup> | Brush/swab | 6 |
| HSV-1/2 | Kawana et al 1976      | Japan          | CC = 14; CON = 14                                                                        | Immunological (CF)         | Antibodies              | Serum      | 6 |
| HSV-2   | Kessler et al 1974     | Yugoslavia     | CC = 350; CON = 350                                                                      | Immunological (NT)         | Antibodies              | Serum      | 6 |
| EBV     | Khenchouche et al 2013 | Algeria        | CC = 58; CIN1 = 16; CIN2/3 = 21; CON = 14                                                | PCR-based (PCR)            | BALF1                   | Biopsy     | 6 |
| HCMV    | Kienka et al 2019      | USA            | CIN1= 4; CIN2/3= 4; CON = 52                                                             | PCR-based (RT-PCR)         | HCMV DNA                | Brush/swab | 7 |
| EBV     |                        |                |                                                                                          |                            | EBV DNA                 |            |   |
| HSV-1/2 | Kumar et al 1980       | USA            | CC = 35; CON = 32                                                                        | Immunological (CF)         | Antibodies              | Serum      | 7 |
| HCMV    |                        |                |                                                                                          |                            |                         |            |   |
| EBV     | Landers et al 1993     | Ireland        | CC = 18; CIN1 = 25; CIN2/3 = 50; CON = 25                                                | Hybridization-based (ISH)  | BamH1 W                 | FFPE       | 6 |

|         |                         |              |                                                             |                                                     |                    |                    |   |
|---------|-------------------------|--------------|-------------------------------------------------------------|-----------------------------------------------------|--------------------|--------------------|---|
| HSV-2   | Lehtinen et al 1989     | Finland      | CC = 14; CON to CC = 28; CIN3 = 15; CON to CIN3 = 30        | Immunological (ELISA)                               | Antibodies         | Serum              | 7 |
| HSV-2   | Lehtinen et al 1992     | Finland      | CC = 32; CON = 62                                           | Immunological (ELISA)                               | Antibodies         | Serum              | 6 |
| HSV-2   | Lehtinen et al 1996     | Finland      | CC = 72; CON = 143                                          | Immunological (ELISA)                               | Antibodies         | Serum              | 7 |
| HSV-2   | Lehtinen et al 2002     | Norway et al | CC = 178; CON = 525                                         | Immunological (ELISA)                               | Antibodies         | Serum              | 7 |
| EBV     | Marinho-Dias et al 2013 | Portugal     | CC = 9; CIN1 = 21; CIN2/3 = 22; CON = 18                    | PCR-based (RT-PCR)                                  | EBV POL            | Brush/swab         | 6 |
| HCMV    |                         |              |                                                             |                                                     |                    |                    |   |
| EBV     | McCormick et al 2015    | Brazil       | CC = 18; CIN1= 17; CIN2/3= 15; CON = 15                     | PCR-based (PCR)                                     | EBV DNA            | Brush/swab         | 5 |
| HSV1/2  | Mcdonald et al 1974     | Canada       | CC = 107; CON to CC = 107;<br>PCL = 39; CON to PCL = 39     | Immunological (NT)                                  | Antibodies         | Serum              | 4 |
| HSV-2   | Mendis et al 1981       | England      | CC = 25; CON = 24                                           | Immunological (ELISA)                               | Antibodies         | Serum              | 7 |
|         |                         | Sri Lanka    | CC = 29; CON = 24                                           |                                                     |                    |                    |   |
|         |                         | Malawi       | CC = 26; CON = 13                                           |                                                     |                    |                    |   |
| HSV-2   | Mendis et al 1981       | England      | CC = 79; CON to CC = 59; PCL = 22; CON to PCL = 28          | Immunological (ELISA)                               | Antibodies         | Serum              | 5 |
| HSV-2   | Muñoz et al 1995        | Spain        | CC = 195; CON to CC = 189; CIN3 = 234; CON to CIN3 =213     | Immunological (ELISA)                               | Antibodies         | Serum              | 7 |
|         |                         | Colombia     | CC = 121; CON to CC = 141; CIN3 = 215; CON to CIN3 =212     |                                                     |                    |                    |   |
| HSV-2   | Nahmias et al 1974      | USA          | CC = 57; CON = 82                                           | Immunological                                       | Antibodies         | Serum              | 7 |
| HSV-1/2 | Najem et al 1983        | England      | CC = 32; CON = 32                                           | Immunological (ELISA)                               | Antibodies         | Serum              | 4 |
| HSV-2   | Peng et al 1991         | China        | CC = 98; CON = 142                                          | Immunological <sup>e</sup>                          | Antibodies         | Serum              | 8 |
| HSV-1/2 | Pérez et al 2006        | Argentina    | CC = 34; CIN1 = 79; CIN2/3 = 74; CON = 79                   | PCR-based (PCR)                                     | HSV-1/2 DNA        | Brush/swab         | 7 |
| EBV     | Santos et al 2009       | Brazil       | CC = 14; CIN2/3 = 66; CON = 89                              | PCR-based (Nested PCR)                              | EBNA3B             | Brush/swab         | 5 |
| EBV     | Sasagawa et al 2000     | Japan        | CC = 31; PCL = 23; CON = 35;<br>CC = 14; PCL = 17; CON = 12 | PCR-based <sup>f</sup><br>Hybridization-based (ISH) | EBV mRNA<br>EBER-1 | Brush/swab<br>FFPE | 7 |
| EBV     | Se Thoe et al 1993      | Malaysia     | CC = 8; CON = 15                                            | Hybridization-based (ISH)                           | BamHIO/K           | Biopsy             | 5 |
| EBV     | Seo et al 2005          | Korea        | CC = 56; CIN3 = 20; CON = 20                                | PCR-based (PCR)                                     | BamHI-W            | Brush/swab         | 5 |

|         |                           |                |                                           |                                  |             |            |   |
|---------|---------------------------|----------------|-------------------------------------------|----------------------------------|-------------|------------|---|
| EBV     | Shimakage et al 2001      | Japan          | CC = 16; PCL = 5; CON = 4                 | Hybridization-based (ISH)        | EBNA-2      | FFPE       | 5 |
| EBV     | Shoji et al 1997          | Japan          | CC = 60; CIN1/2 = 44; CIN3 = 70; CON = 20 | PCR-based (PCR)                  | EBV DNA     | FFPE       | 6 |
| EBV     | Silver et al 2011         | India          | CC = 4; CIN1 = 2; CIN2/3 = 7; CON = 246   | PCR-based (RT-PCR)               | EBV DNA     | Brush/swab | 6 |
| HSV-1/2 | Skinner et al 1977        | England        | CC = 15; CON = 192                        | Immunological (CF)               | Antibodies  | Serum      | 6 |
| EBV     | Szkaradkiewicz et al 2004 | Poland         | CIN1/2 = 12; CIN3 = 10; CON = 26          | PCR-based (PCR)                  | EBV DNA     | Brush/swab | 6 |
| HSV-2   | Thiry et al 1977          | Belgium        | CC = 47; PCL = 88; CON = 51               | Immunological (NT)               | Antibodies  | Serum      | 5 |
| HSV-2   | Vass-Sorensen et al 1984  | Norway         | CC = 44; CON = 30                         | Immunological (Blotting)         | Antibodies  | Serum      | 6 |
| HSV-1/2 | Vestergaard et al 1972    | Denmark        | CC = 135; CON = 115                       | Immunological (CF)               | Antibodies  | Serum      | 6 |
| HSV-2   | Vonka et al 1984          | Czechoslovakia | CC = 21; CIN2/3=221; CON = 472            | Immunological (RIA)              | Antibodies  | Serum      | 5 |
| HSV-2   | Wilkie et al 1980         | England        | CC = 40; PCL = 29; CON = 23               | Hybridization-based              | HSV-2 RNA   | Biopsy     | 5 |
| EBV     | Zhang et al 1992          | China          | CC = 80; CON = 43                         | Hybridization-based <sup>g</sup> | BamHI W     | Biopsy     | 6 |
| HSV-1/2 | Zhao et al 2012           | China          | CC = 24; PCL = 210; CON = 233             | PCR-based (RT-PCR)               | HSV-1/2 DNA | Brush/swab | 6 |
|         |                           |                | CC = 24; PCL = 177; CON = 183             | Immunological (ELISA)            | Antibodies  | Serum      |   |

Note: CC = Cervical cancer; CON = Controls; PCL = Precancerous cervical lesion; NT = Neutralization test; RIA = Radioimmunoassay; CF = Complement fixation test; ISH = In situ hybridization; Biopsy = fresh-frozen tissue;

<sup>a</sup>purified glycoprotein assay; <sup>b</sup>indirect hemagglutination test; <sup>c</sup>indirect fluorescent antibody test; <sup>d</sup>cervical secretions; <sup>e</sup>western Blot; <sup>f</sup> reverse transcriptase-polymerase chain reaction; <sup>g</sup>southern blot.

## References

- Adam, E., Sanders, E. K., and Melnick, J. L. (1974). Antibodies to herpesvirus type 2 in breast cancer and cervical cancer patients. *Cancer* 33, 147-152.
- Adam, E., Kaufman, R. H., and Adler-Storthz, K. (1985). A prospective study of association of herpes simplex virus and human papillomavirus infection with cervical neoplasia in women exposed to diethylstilbestrol in utero. *Int. J. Cancer* 35, 19-26.
- Adelusi, B., Fabiyi, A., and Osunkoya, B. O. (1976). Herpes type 2 viruses and gynaecological malignancies. *International Journal of Gynecology and Obstetrics* 14, 209-212.
- Ammatuna, P., Giovannelli, L., Giambelluca, D., Mancuso, S., Rubino, E., Colletti, P., et al. (2000). Presence of human papillomavirus and Epstein-Barr virus in the cervix of women infected with the human immunodeficiency virus. *J Med Virol* 62, 410-415.
- Arivananthan, M., Yadav, M., and Kumar, S. (1997). Detection of HHV-6 genotypes by in situ hybridization with variant-specific oligonucleotide probes. *J. Virol. Methods* 66, 5-14.
- Arnheim Dahlström, L., Andersson, K., Luostarinen, T., Thoresen, S., Ögmundsdóttir, H., Tryggvadóttir, L., et al. (2011). Prospective seroepidemiologic study of human papillomavirus and other risk factors in cervical cancer. *Cancer Epidemiol Biomarkers Prev* 20, 2541-2550.
- Aromseree, S., Pientong, C., Swangphon, P., Chaiwongkot, A., Patarapadungkit, N., Kleebkaow, P., et al. (2015). Possible contributing role of Epstein-Barr virus (EBV) as a cofactor in human papillomavirus (HPV)-associated cervical carcinogenesis. *J. Clin. Virol.* 73, 70-76.
- Aurelian, L., Davis, H. J., and Julian, C. G. (1973). Herpesvirus type 2 induced, tumor specific antigen in cervical carcinoma. *Am. J. Epidemiol.* 98, 1-9.
- Bahena-Román, M., Sánchez-Alemán, M. A., Contreras-Ochoa, C. O., Lagunas-Martínez, A., Olamendi-Portugal, M., López-Estrada, G., et al. (2020). Prevalence of active infection by herpes simplex virus type 2 in patients with high-risk human papillomavirus infection: A cross-sectional study. *J Med Virol* 92, 1246-1252.
- Becker, T. M., Lee, F., Daling, J. R., and Nahmias, A. J. (1996). Seroprevalence of and risk factors for antibodies to herpes simplex viruses, hepatitis B, and hepatitis C among southwestern Hispanic and non-Hispanic white women. *Sex Transm Dis* 23, 138-144.
- Bell, R. B., Aurelian, L., and Cohen, G. H. (1978). Proteins of herpes virus type 2. IV. Leukocyte inhibition responses to type common antigen(s) in cervix cancer and recurrent herpetic infections. *Cell. Immunol.* 41, 86-102.
- Biganzoli, P., Frutos, M. C., Venezuela, F., Mosmann, J., Kiguen, A., Pavan, J., et al. (2020). Detection of human herpesvirus 6 (HHV-6) and human herpesvirus 7 (HHV-7) DNA in endocervical samples from a positive and negative HPV woman of Córdoba, Argentina. *J Clin Pathol* 73, 30-34.
- Broccolo, F., Cassina, G., Chiari, S., Garcia-Parra, R., Villa, A., Leone, B. E., et al. (2008). Frequency and clinical significance of human  $\beta$ -herpesviruses in cervical samples from Italian women. *J. Med. Virol.* 80, 147-153.
- Brock, K. E., MacLennan, R., Brinton, J. L., Melnick, J. L., Adam, E., Mock, P. A., et al. (1989). Smoking and infectious agents and risk of in situ cervical cancer in Sydney, Australia. *Cancer Res.* 49, 4925-4928.
- Cameron, J. E., Rositch, A. F., Vielot, N. A., Mugo, N. R., Kwatampora, J. K. L., Waweru, W., et al. (2018). Epstein-Barr Virus, High-Risk Human Papillomavirus and Abnormal

- Cervical Cytology in a Prospective Cohort of African Female Sex Workers. *Sex Transm Dis* 45, 666-672.
- Chan, P. K. S., Li, W. H., Chan, M. Y. M., and Cheng, A. F. B. (1999). Detection of human herpesvirus 8 in cervical cells of Chinese women with abnormal Papanicolaou smears. *Clin. Infect. Dis.* 29, 1584-1585.
- Chavoshpour-Mamaghani, S., Shoja, Z., Mollaei-Kandelous, Y., Sharifian, K., and Jalilvand, S. (2021). The prevalence of human herpesvirus 8 in normal, premalignant, and malignant cervical samples of Iranian women. *Viol. J.* 18(1):144.
- Choi, N. W., Shettigara, P. T., Abu-Zeid, H. A., and Nelson, N. A. (1977). Herpesvirus infection and cervical anaplasia: a seroepidemiological study. *Int J Cancer* 19, 167-171.
- Dale, G. E., Coleman, R. M., Best, J. M., Benetato, B. B., Drew, N. C., Chinn, S., et al. (1988). Class-specific herpes simplex virus antibodies in sera and cervical secretions from patients with cervical neoplasia: a multi-group comparison. *Epidemiol Infect* 100, 445-465.
- Daxnerova, Z., Berkova, Z., Kaufman, R. H., and Adam, E. (2003). Detection of human cytomegalovirus DNA in 986 women studied for human papillomavirus-associated cervical neoplasia. *J Low Genit Tract Dis* 7, 187-193.
- de Abreu, A. L., Malaguti, N., Souza, R. P., Uchimura, N. S., Ferreira É, C., Pereira, M. W., et al. (2016). Association of human papillomavirus, Neisseria gonorrhoeae and Chlamydia trachomatis co-infections on the risk of high-grade squamous intraepithelial cervical lesion. *Am J Cancer Res* 6, 1371-1383.
- de Sanjosé, S., Muñoz, N., Bosch, F. X., Reimann, K., Pedersen, N. S., Orfila, J., et al. (1994). Sexually transmitted agents and cervical neoplasia in Colombia and Spain. *Int J Cancer* 56, 358-363.
- D. Soumya KM, M. Nagaraja, R. Rishi Gowtham, N. Umapathi, P. M. Madhavi Latha, A. M. Padmalatha, P. Prakash, Usha Kalawat: Detection of Chlamydia trachomatis and Herpes Simplex Virus-2 Infections Among Clinically Suspected Women with Cervical Cancer or Precancerous Lesions. *Indian Journal of Gynecologic Oncology* 2023, 21:1-7.
- Farivar, T. N., Johari, P., Shafei, S., and Najafipour, R. (2012). Lack of association between herpes simplex virus type 2 infection and cervical cancer--Taq Man realtime PCR assay findings. *Asian Pacific journal of cancer prevention : APJCP* 13, 339-342.
- Feng, M., Duan, R., Gao, Y., Zhang, H., Qiao, Y., Li, Q., et al. (2021). Role of Epstein-Barr Virus and Human Papillomavirus Coinfection in Cervical Intraepithelial Neoplasia in Chinese Women Living With HIV. *Front Cell Infect Microbiol* 11, 703259.
- Ferrera, A., Baay, M. F., Herbrink, P., Figueroa, M., Velema, J. P., and Melchers, W. J. (1997). A sero-epidemiological study of the relationship between sexually transmitted agents and cervical cancer in Honduras. *Int J Cancer* 73, 781-785.
- Graham, S., Rawls, W., Swanson, M., and McCurtis, J. (1982). Sex partners and herpes simplex virus type 2 in the epidemiology of cancer of the cervix. *Am J Epidemiol* 115, 729-735.
- Gupta, M. M., Jain, R., Parashari, A., Singh, V., and Satyanarayana, L. (1992). HSV-IgA serum antibodies in cervical intraepithelial neoplasia and invasive cancer patients, and in their spouses: A case control study. *APMIS* 100, 598-604.

- Janda, Z., Kanka, J., Vonka, V., and Svoboda, B. (1973). A study of herpes simplex type 2 antibody status in groups of patients with cervical neoplasia in Czechoslovakia. *Int. J. Cancer* 12, 626-630.
- Kahla, S., Oueslati, S., Achour, M., Kochbati, L., Chanoufi, M. B., Maalej, M., et al. (2012). Correlation between ebv co-infection and HPV16 genome integrity in Tunisian cervical cancer patients. *Braz J Microbiol* 43, 744-753.
- Kalimo, K., Terho, P., and Honkonen, E. (1981). Chlamydia trachomatis and herpes simplex virus IgA antibodies in cervical secretions of patients with cervical atypia. *British Journal of Obstetrics and Gynaecology* 88, 1130-1134.
- Kawana, T., Cornish, J. D., Smith, M. F., and Aurelian, L. (1976). Frequency of antibody to a virus induced tumor associated antigen (AG 4) in Japanese sera from patients with cervical cancer and controls. *Cancer Res.* 36, 1910-1914.
- Kessler, I. I., Kulcar, Z., and Rawls, W. E. (1974). Cervical cancer in Yugoslavia. I. Antibodies to genital herpesvirus in cases and controls. *Journal of the National Cancer Institute* 52, 369-376.
- Khenchouche, A., Sadouki, N., Boudriche, A., Houali, K., Graba, A., Ooka, T., et al. (2013). Human papillomavirus and Epstein-Barr virus co-infection in cervical carcinoma in Algerian women. *Virology* 45, 340.
- Kienka, T., Varga, M. G., Caves, J., Smith, J. S., and Sivaraman, V. (2019). Epstein-Barr virus, but not human cytomegalovirus, is associated with a high-grade human papillomavirus-associated cervical lesions among women in North Carolina. *J Med Virol* 91, 450-456.
- Kumar, A., Selim, M. S., Madden, D. L., Wallen, W. C., Vasquez, H. H., and Nankervis, G. A. (1980). Humoral-and cell-mediated immune responses to herpesvirus antigens in patients with cervical carcinoma. *Gynecol Oncol* 10, 18-25.
- Landers, R. J., O'Leary, J. J., Crowley, M., Healy, I., Annis, P., Burke, L., et al. (1993). Epstein-Barr virus in normal, pre-malignant, and malignant lesions of the uterine cervix. *J Clin Pathol* 46, 931-935.
- Lehtinen, M., Hakama, M., Knekt, P., Heinonen, P. K., Lehtinen, T., Paavonen, J., et al. (1989). Lack of serum antibodies to the major HSV-2 specified DNA-binding protein before diagnosis of cervical neoplasia. *J Med Virol* 27, 131-136.
- Lehtinen, M., Hakama, M., Aaran, R. K., Aromaa, A., Knekt, P., Leinikki, P., et al. (1992). Herpes simplex virus type 2 infection and cervical cancer: a prospective study of 12 years of follow-up in Finland. *Cancer Causes Control* 3, 333-338.
- Lehtinen, M., Dillner, J., Knekt, P., Luostarinen, T., Aromaa, A., Kirnbauer, R., et al. (1996). Serologically diagnosed infection with human papillomavirus type 16 and risk for subsequent development of cervical carcinoma: nested case-control study. *BMJ* 312, 537-539.
- Lehtinen, M., Koskela, P., Jellum, E., Bloigu, A., Anttila, T., Hallmans, G., et al. (2002). Herpes simplex virus and risk of cervical cancer: a longitudinal, nested case-control study in the nordic countries. *Am. J. Epidemiol.* 156, 687-692.

- Marinho-Dias, J., Ribeiro, J., Monteiro, P., Loureiro, J., Baldaque, I., Medeiros, R., et al. (2013). Characterization of cytomegalovirus and epstein-barr virus infection in cervical lesions in Portugal. *J. Med. Virol.* 85, 1409-1413.
- McCormick, T. M., Canedo, N. H., Furtado, Y. L., Silveira, F. A., de Lima, R. J., Rosman, A. D., et al. (2015). Association between human papillomavirus and Epstein - Barr virus DNA and gene promoter methylation of RB1 and CDH1 in the cervical lesions: a transversal study. *Diagn Pathol* 10, 59.
- McDonald, A. D., Williams, M. C., Manfreda, J., and West, R. (1974). Neutralizing antibodies to herpesvirus types 1 and 2 in carcinoma of the cervix, carcinoma in situ and cervical dysplasia. *Am. J. Epidemiol.* 100, 130-135.
- Mendis, L. N., Best, J. M., and Senarath, L. (1981). A geographical study of antibodies to membrane antigens of HSV-2-infected cells and HSV-2-specific antibodies in patients with cervical cancer. *Int. J. Cancer* 28, 535-542.
- Mendis, L. N., Best, J. M., and Banatvala, J. E. (1981). Class-specific antibodies (IgG and IgA) to membrane antigens of herpes simplex type-2 infected cells in patients with cervical dysplasia and neoplasia. *Int. J. Cancer* 27, 669-677.
- Muñoz, N., Kato, I., Bosch, F. X., De Sanjosé, S., Sundquist, V. A., Izarzugaza, I., et al. (1995). Cervical cancer and herpes simplex virus type 2: case-control studies in Spain and Colombia, with special reference to immunoglobulin-G sub-classes. *Int. J. Cancer* 60, 438-442.
- Nahmias, A. J., Naib, Z. M., and Josey, W. E. (1974). Epidemiological studies relating genital herpetic infection to cervical carcinoma. *Cancer Res.* 34, 1111-1117.
- Najem, S. N., Vestergaard, B. F., and Potter, C. W. (1983). Herpes simplex virus type-specific antibodies detected by indirect and competition ELISA. Comparison of sera from patients with carcinoma of the uterine cervix, age matched controls and patients with recurrent genital herpes. *Acta Pathologica Microbiologica et Immunologica Scandinavica - Section B Microbiology* 91, 205-207.
- Peng, H. Q., Liu, S. L., Mann, V., Rohan, T., and Rawls, W. (1991). Human papillomavirus types 16 and 33, herpes simplex virus type 2 and other risk factors for cervical cancer in Sichuan Province, China. *Int. J. Cancer* 47, 711-716.
- Pérez, L. O., Barbisan, G., Abba, M. C., Laguens, R. M., Dulout, F. N., and Golijow, C. D. (2006). Herpes simplex virus and human papillomavirus infection in cervical disease in Argentine women. *Int. J. Gynecol. Pathol.* 25, 42-47.
- Santos, N. B., Villanova, F. E., Andrade, P. M., Ribalta, J., Focchi, J., Otsuka, A. Y., et al. (2009). Epstein-Barr virus detection in invasive and pre-invasive lesions of the uterine cervix. *Oncol Rep* 21, 403-405.
- Sasagawa, T., Shimakage, M., Nakamura, M., Sakaike, J., Ishikawa, H., and Inoue, M. (2000). Epstein-Barr virus (EBV) genes expression in cervical intraepithelial neoplasia and invasive cervical cancer: a comparative study with human papillomavirus (HPV) infection. *Hum Pathol* 31, 318-326.
- Se Thoe, S. Y., Wong, K. K., Pathmanathan, R., Sam, C. K., Cheng, H. M., and Prasad, U. (1993). Elevated secretory IgA antibodies to Epstein-Barr virus (EBV) and presence of EBV DNA and EBV receptors in patients with cervical carcinoma. *Gynecol Oncol* 50, 168-172.



- Seo, S. S., Kim, W. H., Song, Y. S., Kim, S. H., Kim, J. W., Park, N. H., et al. (2005). Epstein-Barr virus plays little role in cervical carcinogenesis in Korean women. *Int J Gynecol Cancer* 15, 312-318.
- Shimakage, M., and Sasagawa, T. (2001). Detection of Epstein-Barr virus-determined nuclear antigen-2 mRNA by in situ hybridization. *J Virol Methods* 93, 23-32.
- Shoji, Y., Saegusa, M., Takano, Y., Hashimura, M., and Okayasu, I. (1997). Detection of the Epstein-Barr virus genome in cervical neoplasia is closely related to the degree of infiltrating lymphoid cells: a polymerase chain reaction and in situ hybridization approach. *Pathol Int* 47, 507-511.
- Silver, M. I., Paul, P., Sowjanya, P., Ramakrishna, G., Vedantham, H., Kalpana, B., et al. (2011). Shedding of Epstein-Barr virus and cytomegalovirus from the genital tract of women in a periurban community in Andhra Pradesh, India. *J. Clin. Microbiol.* 49, 2435-2439.
- Skinner, G. R. B., Whitney, J. E., and Hartley, C. (1977). Prevalence of type specific antibody against type 1 and type 2 herpes simplex virus in women with abnormal cervical cytology; evidence towards pre pubertal vaccination of sero negative female subjects. *Arch. Virol.* 54, 211-221.
- Szkaradkiewicz, A., Wal, M., Kuch, A., and Pieta, P. (2004). Human papillomavirus (HPV) and Epstein-Barr virus (EBV) cervical infections in women with normal and abnormal cytology. *Pol J Microbiol* 53, 95-99.
- Thiry, L., Sprecher Goldberger, S., and Hannecart Pokorni, E. (1977). Specific non immunoglobulin G antibodies and cell mediated response to herpes simplex virus antigens in women with cervical carcinoma. *Cancer Res.* 37, 1301-1306.
- Vass-Sorensen, M., Abeler, V., and Berle, E. (1984). Prevalence of antibodies to herpes simplex virus and frequency of HLA antigens in patients with preinvasive and invasive cervical cancer. *Gynecol. Oncol.* 18, 349-358.
- Vestergaard, B. F., Hornsleth, A., and Pedersen, S. N. (1972). Occurrence of herpes- and adenovirus antibodies in patients with carcinoma of the cervix uteri. Measurement of antibodies to herpesvirus hominis (types 1 and 2), cytomegalovirus, EB-virus, and adenovirus. *Cancer* 30, 68-74.
- Vonka, V., Kanka, J., and Hirsch, I. (1984). Prospective study on the relationship between cervical neoplasia and herpes simplex type-2 virus. II. Herpes simplex type-2 antibody presence in sera taken at enrolment. *Int. J. Cancer* 33, 61-66.
- Wilkie, N. M., Eglin, R. P., Sanders, P. G., and Clements, J. B. (1980). The association of herpes simplex virus with squamous carcinoma of the cervix, and studies of the virus thymidine kinase gene. *Proceedings of the Royal Society of London - Biological Sciences* 210, 411-421.
- Zhang, W., Jin, S. Q., Li, J. Y., Liang, X., Ming, L. H., Wang, X. H., et al. (1992). The infection of EBV for cervical epithelium-a new causative agent in the development of cervical carcinomas? *Chin. J. Cancer Res.*, 26-32.
- Zhao, Y., Cao, X., Zheng, Y., Tang, J., Cai, W., Wang, H., et al. (2012). Relationship between cervical disease and infection with human papillomavirus types 16 and 18, and herpes simplex virus 1 and 2. *J. Med. Virol.* 84, 1920-1927.

**Supplementary Table 2. Summary of studies included in adjusted OR estimates**

| Study                 | Stage of disease | Adjusted odds ratio<br>(95%CI) | Adjusted potential confounding factors                                                                 |
|-----------------------|------------------|--------------------------------|--------------------------------------------------------------------------------------------------------|
| Arnheim et al 2011    | CC               | 1.1 (0.9-1.5)                  | HPV16, HPV18, <i>C. trachomatis</i> , and cotinine                                                     |
| Ferrera et al 1997    | CC               | 0.80 (0.04–15.1)               | HPV                                                                                                    |
| Lehtinen et al 1996   | CC               | 0.6 (0.2-1.4)                  | Smoking and sexually transmitted disease                                                               |
| Muñoz et al 1995      | PCL(CIN3)        | 1.17 (0.65-2.14)               | age, center, parity, number of sexual partners                                                         |
|                       | CC               | 1.46 (0.82-2.59)               | age at first sexual intercourse, education, smoking status, chlamydia antibodies and HPV status by PCR |
| Peng et al 1991       | CC               | 1.3 (0.7-2.3)                  | age, income, residence, age at first marriage, and cigarette smoking                                   |
| de Sanjosé et al 1994 | PCL (CIN3)       | 1.2 (0.7-2.0)                  | age, center, number of sexual partners, age at first sex,                                              |
|                       | CC               | 1.1 (0.6-1.7)                  | antibodies to <i>C. trachomatis</i> , HPV-PCR and males' partners                                      |
| Gupta et al 1992      | PCL (CIN1/2)     | 7.3 (2.3-22.2)                 | age                                                                                                    |
|                       | PCL (CIN3)       | 8.9 (3.2-24.7)                 |                                                                                                        |
|                       | CC               | 4.9 (2.0-12.2)                 |                                                                                                        |
| Pérez et al 2006      | PCL (CIN1)       | 1.7 (0.5–6.01)                 | age and HPV                                                                                            |
|                       | PCL (CIN2/3)     | 1.4 (0.4–4.7)                  |                                                                                                        |
|                       | CC               | 1.6 (0.3–7.2)                  |                                                                                                        |
| Zhao et al 2012       | PCL (CIN)        | 4.9 (1.3-15.4)                 | age                                                                                                    |
|                       | CC               | 4.7 (1.1-6.8)                  |                                                                                                        |

CC = cervical; PCL = precancerous cervical lesions; CIN = cervical intraepithelial neoplasia, grade 1 (CIN1), grade 2 (CIN2), grade 3 (CIN3);

## References

- Arnhem Dahlström, L., Andersson, K., Luostarinen, T., Thoresen, S., Ögmundsdóttir, H., Tryggvadóttir, L., et al. (2011). Prospective seroepidemiologic study of human papillomavirus and other risk factors in cervical cancer. *Cancer Epidemiol Biomarkers Prev* 20, 2541-2550.
- Ferrera, A., Baay, M. F., Herbrink, P., Figueroa, M., Velema, J. P., and Melchers, W. J. (1997). A sero-epidemiological study of the relationship between sexually transmitted agents and cervical cancer in Honduras. *Int J Cancer* 73, 781-785.
- Lehtinen, M., Dillner, J., Knekt, P., Luostarinen, T., Aromaa, A., Kirnbauer, R., et al. (1996). Serologically diagnosed infection with human papillomavirus type 16 and risk for subsequent development of cervical carcinoma: nested case-control study. *BMJ* 312, 537-539.
- Muñoz, N., Kato, I., Bosch, F. X., De Sanjosé, S., Sundquist, V. A., Izarzugaza, I., et al. (1995). Cervical cancer and herpes simplex virus type 2: case-control studies in Spain and Colombia, with special reference to immunoglobulin-G sub-classes. *Int. J. Cancer* 60, 438-442.
- Peng, H. Q., Liu, S. L., Mann, V., Rohan, T., and Rawls, W. (1991). Human papillomavirus types 16 and 33, herpes simplex virus type 2 and other risk factors for cervical cancer in Sichuan Province, China. *Int. J. Cancer* 47, 711-716.
- de Sanjosé, S., Muñoz, N., Bosch, F. X., Reimann, K., Pedersen, N. S., Orfila, J., et al. (1994). Sexually transmitted agents and cervical neoplasia in Colombia and Spain. *Int J Cancer* 56, 358-363.
- Gupta, M. M., Jain, R., Parashari, A., Singh, V., and Satyanarayana, L. (1992). HSV-IgA serum antibodies in cervical intraepithelial neoplasia and invasive cancer patients, and in their spouses: A case control study. *APMIS* 100, 598-604.
- Pérez, L. O., Barbisan, G., Abba, M. C., Laguens, R. M., Dulout, F. N., and Golijow, C. D. (2006). Herpes simplex virus and human papillomavirus infection in cervical disease in Argentine women. *Int. J. Gynecol. Pathol.* 25, 42-47.
- Zhao, Y., Cao, X., Zheng, Y., Tang, J., Cai, W., Wang, H., et al. (2012). Relationship between cervical disease and infection with human papillomavirus types 16 and 18, and herpes simplex virus 1 and 2. *J. Med. Virol.* 84, 1920-1927.

**Supplementary Table 3. Meta-regression analysis for association between HHVs and cervical lesions (PCL and CC)**

|                      | Univariate analysis |                              | R <sup>2</sup> (%) | Multivariate analysis |                             |
|----------------------|---------------------|------------------------------|--------------------|-----------------------|-----------------------------|
|                      | p value             | Estimate (95%CI)             |                    | p value               | Estimate (95%CI)            |
| Method               |                     |                              | 0.00               |                       |                             |
| Immunological        | 0.0357              | -0.9204 (-1.7793 to -0.0616) |                    | 0.8127                | 0.1846 (-1.3423 to 1.7115)  |
| PCR-based            | 0.0851              | -0.7763 (-1.6599 to 0.1074)  |                    | 0.9434                | -0.0413 (-1.1823 to 1.0997) |
| Hybridization-based  | Ref                 | Ref                          |                    | Ref                   | Ref                         |
| Specimen             |                     |                              | 1.46               |                       |                             |
| Serum                | 0.0710              | -0.6898 (-1.4386 to 0.0590)  |                    | 0.1649                | -1.0411 (-2.5106 to 0.4283) |
| FFPE                 | 0.5257              | 0.3529 (-0.7370 to 1.4428)   |                    | 0.6401                | 0.2676 (-0.8544 to 1.3897)  |
| Brush/swab           | 0.0909              | -0.6825 (-1.4737 to 0.1088)  |                    | 0.1220                | -0.7175 (-1.6268 to 0.1918) |
| Biopsy(fresh-frozen) | Ref                 | Ref                          |                    | Ref                   | Ref                         |
| FFPE + Brush/swab    | 0.1449              | -1.0789 (-2.5293 to 0.3716)  |                    | 0.1604                | -1.0534 (-2.5242 to 0.4175) |
| Biopsy + Brush/swab  | 0.1824              | -1.1259 (-2.7809 to 0.5291)  |                    | 0.1974                | -1.1001 (-2.7730 to 0.5727) |
| HDI regions          |                     |                              | 8.57               |                       |                             |
| Low HDI              | 0.0057              | 1.9876 (0.5789 to 3.3962)    |                    | 0.0027                | 2.2146 (0.7689 to 3.6604)   |
| Medium HDI           | 0.4275              | 0.3013 (-0.4430 to 1.0456)   |                    | 0.2401                | 0.4707 (-0.3146 to 1.2561)  |
| High HDI             | Ref                 | Ref                          |                    | Ref                   | Ref                         |
| Very high HDI        | 0.9491              | 0.0121 (-0.3598 to 0.3840)   |                    | 0.5931                | 0.1218 (-0.3250 to 0.5686)  |
| Year of publication  |                     |                              | 0.11               |                       |                             |
| Before 2000          | Ref                 | Ref                          |                    | Ref                   | Ref                         |
| After 2001           | 0.4530              | 0.1350 (-0.2177 to 0.4877)   |                    | 0.8333                | 0.0622 (-0.5167 to 0.6410)  |

**Supplementary Table 4. Meta-regression analysis for association between HSV-1 and cervical lesions (PCL and CC)**

|                     | Univariate analysis |                             | R <sup>2</sup> (%) | Multivariate analysis |                             |
|---------------------|---------------------|-----------------------------|--------------------|-----------------------|-----------------------------|
|                     | p value             | Estimate (95%CI)            |                    | p value               | Estimate (95%CI)            |
| Method              |                     |                             | 0.00               |                       |                             |
| Immunological       | Ref                 | Ref                         |                    | Ref                   | Ref                         |
| PCR-based           | 0.6247              | -0.2814 (-1.4089 to 0.8461) |                    | 0.9235                | 0.1052 (-2.0427 to 2.2530)  |
| Specimen            |                     |                             | 0.00               |                       |                             |
| Serum               | 0.3704              | 0.4496 (-0.5342 to 1.4333)  |                    | 0.9102                | -0.1848 (-3.3945 to 3.0249) |
| Brush/swab          | Ref                 | Ref                         |                    | Ref                   | Ref                         |
| HDI regions         |                     |                             | 0.00               |                       |                             |
| High HDI            | Ref                 | Ref                         |                    | Ref                   | Ref                         |
| Very high HDI       | 0.4056              | 0.4724 (-0.6410 to 1.5859)  |                    | 0.8481                | -0.2363 (-2.6551 to 2.1825) |
| Year of publication |                     |                             | 0.00               |                       |                             |
| Before 2000         | Ref                 | Ref                         |                    | Ref                   | Ref                         |
| After 2001          | 0.3704              | -0.4496 (-1.4333 to 0.5342) |                    | 0.4936                | -1.0245 (-3.9578 to 1.9087) |

**Supplementary Table 5. Meta-regression analysis for association between HSV-2 and cervical lesions (PCL and CC)**

|                      | Univariate analysis |                              | R <sup>2</sup> (%) | Multivariate analysis |                              |
|----------------------|---------------------|------------------------------|--------------------|-----------------------|------------------------------|
|                      | p value             | Estimate (95%CI)             |                    | p value               | Estimate (95%CI)             |
| Method               |                     |                              | 6.93               |                       |                              |
| Immunological        | 0.0095              | -2.1160 (-3.7152 to -0.5169) |                    | 0.2865                | 0.6758 (-0.5671 to 1.9187)   |
| PCR-based            | 0.0187              | -2.0603 (-3.7783 to -0.3423) |                    | 0.0228                | -2.0115 (-3.7425 to -0.2804) |
| Hybridization-based  | Ref                 | Ref                          |                    | Ref                   | Ref                          |
| Specimen             |                     |                              | 8.74               |                       |                              |
| Serum                | 0.0087              | -2.1316 (-3.7235 to -0.5397) |                    | 0.0035                | -2.9144 (-4.8732 to -0.9556) |
| FFPE                 | 0.0138              | -4.5944 (-8.2500 to -0.9387) |                    | 0.0206                | -4.3065 (-7.9510 to -0.6620) |
| Brush/swab           | 0.0354              | -1.8358 (-3.5459 to -0.1257) |                    | 0.0833                | -1.5655 (-3.3370 to 0.2060)  |
| Biopsy(fresh-frozen) | Ref                 | Ref                          |                    | Ref                   | Ref                          |
| HDI regions          |                     |                              | 16.31              |                       |                              |
| Low HDI              | 0.0116              | 1.7478 (0.3910 to 3.1045)    |                    | 0.0081                | 1.7998 (0.4670 to 3.1326)    |
| Medium HDI           | 0.9988              | 0.0008 (-0.9876 to 0.9891)   |                    | 0.7410                | 0.1650 (-0.8136 to 1.1437)   |
| High HDI             | Ref                 | Ref                          |                    | Ref                   | Ref                          |
| Very high HDI        | 0.4365              | -0.1978 (-0.6958 to 0.3003)  |                    | 0.4292                | -0.2169 (-0.7546 to 0.3208)  |
| Year of publication  |                     |                              | 0.00               |                       |                              |
| Before 2000          | Ref                 | Ref                          |                    | Ref                   | Ref                          |
| After 2001           | 0.6624              | -0.1208 (-0.6629 to 0.4214)  |                    | 0.1649                | -0.5021 (-1.2106 to 0.2065)  |

**Supplementary Table 6. Meta-regression analysis for association between EBV and cervical lesions (PCL and CC)**

|                      | Univariate analysis |                             | R <sup>2</sup> (%) | Multivariate analysis |                             |
|----------------------|---------------------|-----------------------------|--------------------|-----------------------|-----------------------------|
|                      | p value             | Estimate (95%CI)            |                    | p value               | Estimate (95%CI)            |
| Method               |                     |                             | 0.00               |                       |                             |
| PCR-based            | 0.7324              | 0.2032 (-0.9618 to 1.3683)  |                    | 0.3582                | 0.6673 (-0.7562 to 2.0908)  |
| Hybridization-based  | Ref                 | Ref                         |                    | Ref                   | Ref                         |
| Specimen             |                     |                             | 4.04               |                       |                             |
| FFPE                 | 0.1491              | 0.9228 (-0.3309 to 2.1765)  |                    | 0.0085                | 2.5882 (0.6617 to 4.5147)   |
| Brush/swab           | 0.5600              | 0.3267 (-0.7718 to 1.4251)  |                    | 0.2862                | 0.7933 (-0.6645 to 2.2511)  |
| Biopsy(fresh-frozen) | Ref                 | Ref                         |                    | Ref                   | Ref                         |
| Biopsy + Brush/swab  | 0.3951              | -0.7844 (-2.5923 to 1.0235) |                    | 0.2160                | -1.0417 (-2.6919 to 0.6084) |
| HDI regions          |                     |                             | 0.00               |                       |                             |
| Medium HDI           | 0.3977              | 0.6647 (-0.8758 to 2.2052)  |                    | 0.7145                | -0.3131 (-1.9905 to 1.3644) |
| High HDI             | Ref                 | Ref                         |                    | Ref                   | Ref                         |
| Very high HDI        | 0.6949              | 0.1959 (-0.7833 to 1.1751)  |                    | 0.0608                | -1.4516 (-2.9693 to 0.0661) |
| Year of publication  |                     |                             | 8.45               |                       |                             |
| Before 2000          | Ref                 | Ref                         |                    | Ref                   | Ref                         |
| After 2001           | 0.4247              | 0.5323 (-0.7745 to 1.8392)  |                    | 0.4085                | 0.6383 (-0.8754 to 2.1520)  |

**Supplementary Table 7. Meta-regression analysis for association between HCMV and cervical lesions (PCL and CC)**

|                     | Univariate analysis |                             | R <sup>2</sup> (%) | Multivariate analysis |                             |
|---------------------|---------------------|-----------------------------|--------------------|-----------------------|-----------------------------|
|                     | p value             | Estimate (95%CI)            |                    | p value               | Estimate (95%CI)            |
| Method              |                     |                             | 0.00               |                       |                             |
| Immunological       | Ref                 | Ref                         |                    | Ref                   | Ref                         |
| PCR-based           | 0.4248              | 0.2692 (-0.3919 to 0.9302)  |                    | 0.3894                | 0.8108 (-1.0357 to 2.6574)  |
| Specimen            |                     |                             | 0.00               |                       |                             |
| Serum               | 0.4248              | -0.2692 (-0.9302 to 0.3919) |                    | 0.3959                | -0.7719 (-2.5541 to 1.0103) |
| Brush/swab          | Ref                 | Ref                         |                    | Ref                   | Ref                         |
| HDI regions         |                     |                             | 0.00               |                       |                             |
| Medium HDI          | 0.7717              | -0.2240 (-1.7373 to 1.2893) |                    | 0.7506                | 0.3167 (-1.6366 to 2.2701)  |
| High HDI            | Ref                 | Ref                         |                    | Ref                   | Ref                         |
| Very high HDI       | 0.2430              | 0.5495 (-0.3729 to 1.4719)  |                    | 0.2071                | 1.0128 (-0.5606 to 2.5862)  |
| Year of publication |                     |                             | 0.00               |                       |                             |
| Before 2000         | Ref                 | Ref                         |                    | Ref                   | Ref                         |
| After 2001          | 0.3089              | 0.3885 (-0.3599 to 1.1369)  |                    | 0.5722                | -0.5763 (-2.5761 to 1.4235) |



**Supplementary Table 8. GRADE assessment for primary outcomes**

| Certainty assessment |              |               |                      |             |                  |                      | Summary of findings |                   |                       |
|----------------------|--------------|---------------|----------------------|-------------|------------------|----------------------|---------------------|-------------------|-----------------------|
| Outcome              | Risk of bias | Inconsistency | Indirectness         | Imprecision | Publication bias | Study (participant)  | OR (95% CI)         | GRADE of evidence |                       |
| HHVs                 | PCL          | Not serious   | Serious <sup>a</sup> | Not serious | Not serious      | Not serious          | 43 (6865/8352)      | 1.91 (1.54–2.36)  | Very low              |
|                      | CC           | Not serious   | Serious <sup>a</sup> | Not serious | Not serious      | Serious <sup>b</sup> | 55 (5802/11721)     | 2.81 (2.19–3.61)  | Very low <sup>c</sup> |
| HSV-1                | PCL          | Not serious   | Not serious          | Not serious | Not serious      | Not serious          | 7 (940/1513)        | 1.06 (0.81-1.39)  | Low                   |
|                      | CC           | Not serious   | Serious <sup>a</sup> | Not serious | Not serious      | Not serious          | 11(609/1250)        | 1.59(0.73-3.45)   | Very low              |
| HSV-2                | PCL          | Not serious   | Serious <sup>a</sup> | Not serious | Not serious      | Not serious          | 22 (3175/3927)      | 2.04 (1.46-2.84)  | Low <sup>c</sup>      |
|                      | CC           | Not serious   | Serious <sup>a</sup> | Not serious | Not serious      | Serious <sup>b</sup> | 38 (3991/8427)      | 3.13 (2.35-4.18)  | Very low <sup>c</sup> |
| HCMV                 | PCL          | Not serious   | Not serious          | Not serious | Not serious      | Not serious          | 7 (1291/1202)       | 1.30 (0.83-2.02)  | Low                   |
|                      | CC           | Not serious   | Not serious          | Not serious | Not serious      | Not serious          | 6 (611/932)         | 1.46 (0.80-2.64)  | Low                   |
| EBV                  | PCL          | Not serious   | Not serious          | Not serious | Not serious      | Not serious          | 16 (770/1134)       | 3.55 (2.52-5.00)  | Moderate <sup>c</sup> |
|                      | CC           | Not serious   | Serious <sup>a</sup> | Not serious | Not serious      | Not serious          | 14 (470/719)        | 4.89 (2.18-10.96) | Low <sup>c</sup>      |

PCL: precancerous cervical lesions; CC: Cervical cancer; CI: Confidence interval; OR: Odds ratio

Explanations: In the GRADE approach, observation studies start as low-quality evidence<sup>[1]</sup>

a, I<sup>2</sup>>50%; b. Peters test P<0.05; c, Upgrading, for large effects report if relative effect is >2 or >5.

## Reference

1. Guyatt G, Oxman AD, Akl EA, Kunz R, Vist G, Brozek J, Norris S, Falck-Ytter Y, Glasziou P, DeBeer H, et al: **GRADE guidelines: 1. Introduction-GRADE evidence profiles and summary of findings tables.** *J Clin Epidemiol* 2011, **64**:383-394.
